# Supplementary material for: Principles of ecDNA random inheritance drive rapid genome change and therapy resistance in human cancers
Source: bioRxiv or medRxiv preprint supplement (doi:10.1101/2021.06.11.447968), 2021-06-11
Supplement: Supplementary file [file media-1.pdf]

2  
3 **Introduction**

4  
5 Here we develop and analyse a baseline mathematical model of random ecDNA segregation  
6 in exponentially growing tumour populations. This will allow us to work out a set of dynamic  
7 predictions to distinguish ecDNA behaviour under neutral or positive selection. We will see  
8 that certain properties, such as the mean ecDNA copy number per cell and the fraction of  
9 cells with and without ecDNA fundamentally differ between these two scenarios.

10  
11 We first present stochastic computer simulations using an agent-based model and compare  
12 the simulations against experimental data. Next, we develop a complete and fine-grained  
13 picture of ecDNA dynamics and work out the theoretical dynamics of moments as well as the  
14 expected scaling of the ecDNA copy number distribution. This is followed by a simplified  
15 deterministic approximation that will allow us to follow the change of cell populations with  
16 and without ecDNA copies in time. These analytical results are compared both against  
17 experimental data as well as stochastic simulations.

18  
19 Our mathematical model is based on five assumptions: (i) ecDNA copies are segregated  
20 randomly between daughter cells; (ii) the cell population is exponentially growing; (iii) ecDNA  
21 replicates at the same rate as chromosomal DNA doubling during the cell cycle; (iv) the  
22 population starts with a single cell carrying a single copy of ecDNA; (v) a cell that has lost all  
23 ecDNA does not regain them.

24  
25 Our reasoning for these assumptions is as follows: (i) We have experimentally verified this  
26 property across different cell lines with different ecDNA amplified genes. This is the  
27 fundamental dynamic property that distinguishes ecDNA copy number evolution from the  
28 evolution of somatic copy number alterations on chromosomes. (ii) We are interested in  
29 ecDNA evolution in growing tumour populations. (iii) This assumption can be justified  
30 retrospectively. If ecDNA is amplified with any coefficient  $> 2$  the ecDNA copy number per  
31 cell explodes within a few generations and each cell would be expected to carry thousands of  
32 ecDNA copies. This ecDNA copy number inflation is not observed in any of the cell line or  
33 patient data. (iv) Here we are interested in specific types of ecDNA amplifications. If we say a  
34 cell carries  $k$  copies of ecDNA, we mean exactly  $k$  copies of one particular complex  
35 amplification, e.g. EGFR in Glioblastoma or MYCN in Neuroblastoma. These are large and  
36 complex genomic structures, and we assume that their origin is a single catastrophic event in  
37 the evolutionary history of a tumour and a repeated production of the exact same circular  
38 DNA structure containing millions of base pairs is extremely unlikely. There very well can be  
39 situations, where cells carry multiple types (species) of ecDNA, e.g. an EGFR and MYC  
40 amplification. In this situation, we would introduce two copy numbers  $k_1$  and  $k_2$  that keep  
41 track of the temporal evolution of those two species independently. (v) ecDNA formation is a  
42 rare, random event. Most ecDNA impose a metabolic load on the cell, are deleterious to its  
43 fitness and lost rapidly. Very rarely, an ecDNA is created that carries a proliferative element  
44 (e.g. an oncogene) which provides a growth and proliferative advantage to the cell.

45  
46 Our notation will be as follows.  $N(t)$  refers to the number of cells  $N$  at any particular time  $t$   
47 during the growth of the tumour.  $N_k(t)$  refers to the number of cells with exactly  $k$  copies of

ecDNA at time  $t$ . The copy number per cell,  $k$ , can in principle range from zero to infinity. With this we can formulate the equation for the expected temporal change of cells with  $k$  ecDNA copies. For simplicity, we first explain the case of neutral ecDNA dynamics (cell with and without ecDNA have the same properties).

52  
53  
54  
55

### 1.1 Agent based stochastic computer simulations of ecDNA segregation

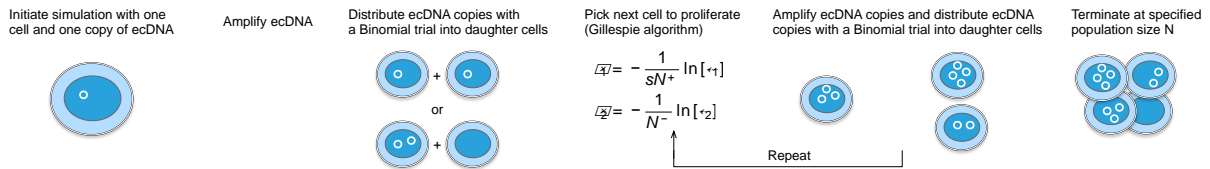

56  
57  
58  
59  
60  
61

**Figure SI 1.** Schematic of the stochastic simulations for random ecDNA segregation in exponentially growing tumour populations.

A schematic of the simulations can be found in Figure SI 1. All simulations are exact agent-based implementations of the underlying stochastic process. Simulations are initiated with a single cell carrying a single copy of ecDNA. Upon proliferation, the number of ecDNA copies in a cell are doubled and distributed between two daughter cells following a Binomial trial with success probability  $1/2$ . From thereon, the next cell to proliferate is chosen following a Gillespie algorithm. Briefly, we draw two random numbers  $\zeta_1$  and  $\zeta_2$  from a Uniform distribution in the interval  $[0,1]$  and calculate the corresponding reaction times for cells with ecDNA ( $N^+$ ) and cells without ecDNA ( $N^-$ ), given by  $\tau_1 = -\frac{1}{sN^+} \ln[\zeta_1]$  and  $\tau_2 = -\frac{1}{N^-} \ln[\zeta_2]$ . Whichever reaction time is smaller, is the next cell chosen for proliferation. Again, the ecDNA copy number of the cell is doubled and distributed into two daughter cells following a Binomial trial with success rate  $1/2$ . This process is iterated until the cell population reaches a predefined number of cells  $N$ . The same stochastic process can be used to simulate related dynamics for non-random ecDNA segregation. We just need to replace the Binomial trial by a segregation probability of interest, e.g. we could have non-random biased segregation with  $p > 1/2$ , or strict chromosomal segregation where each daughter cell always receives equal number of ecDNA copies. These simulations introduce two sources of stochasticity. The next cell to proliferate is picked at random, but proportional to fitness. The Gillespie algorithm (Gillespie, Journal of Physical Chemistry 1977) offers an exact stochastic implementation of the underlying Markov Chain and its implementation is standard in these types of individual based simulations. The second source of randomness emerges from the segregation of ecDNA copies into daughter cells after division. Computer simulations of (non)random ecDNA segregation have been implemented in C++ and the code to run the simulations is available <https://github.com/BenWernerScripts>.

85  
86

### 1.2 Comparison of stochastic simulations and experimental observations

87  
88  
89  
90

The final output of our stochastic simulations is a population of cells, each cell with a particular ecDNA copy number. These copy number distributions can be followed over time, and all information of interest, e.g. the population of cells with and without ecDNA, the mean

91 and variance of the ecDNA distribution, the actual ecDNA copy number distribution as well as  
 92 the power law scaling of the ecDNA distribution can be constructed.

93

94 We use a Kolmogorov-Smirnov test to compare the ecDNA copy number distributions from  
 95 stochastic computer simulations and experimentally observed distributions in patients or cell  
 96 line experiments. The test first gives the  $KS_d$  distance, with smaller values indicating better  
 97 agreement. It also allows us to calculate a  $p_{KS}$  value. The test compares two probability  
 98 distributions for distance  $d$ , the  $p$ -value corresponds to the probability of obtaining  $d$  or  
 99 smaller given the that the two distributions are different. For the ecDNA copy number  
 100 distributions, we also use the Shapiro-Wilk statistics, to test for deviations from a normal  
 101 distribution. In addition, to show goodness of fits, we added Quantile-Quantile plots for all  
 102 comparisons of experimental and theoretical distributions.

103

| Sample      | $KS_d^{\text{random}}$ | $p_{KS}^{\text{random}}$ | $KS_d^{\text{non-random}}$ | $p_{KS}^{\text{non-random}}$ | $p_{\text{ShapiroWilk}}$ | #samples |
|-------------|------------------------|--------------------------|----------------------------|------------------------------|--------------------------|----------|
| PC3_Myc     | 0.065                  | 0.375                    | 0.46                       | 0                            | 0.758                    | 200      |
| SNU16_Myc   | 0.039                  | 0.918                    | 0.49                       | 0                            | 0.939                    | 194      |
| SNU16_fgfr2 | 0.063                  | 0.415                    | 0.49                       | 0                            | $4.2 \times 10^{-9}$     | 196      |
| GBM39_EGFR  | 0.072                  | 0.221                    | 0.46                       | 0                            | 0.001                    | 210      |
| COLO_Myc    | 0.033                  | 0.973                    | 1                          | 0                            | 0.196                    | 206      |

104

105 **Table SI 1.** Test statistics to compare the theoretical distributions with experimental observations for the single  
 106 cell ecDNA segregation probabilities as presented in Figure 1c in the main text. The similarity of the two  
 107 distributions is tested by a Kolmogorov-Smirnov test for two competing hypothesis, random ecDNA segregation  
 108 and non-random chromosomal segregation. We also test for normality using the Shapiro-Wilk statistics.

109

| Sample      | $KS_d^{\text{random}}$ | $p_{KS}^{\text{random}}$ | $KS_d^{\text{non-random}}$ | $p_{KS}^{\text{non-random}}$ | $p_{\text{ShapiroWilk}}$ | #samples |
|-------------|------------------------|--------------------------|----------------------------|------------------------------|--------------------------|----------|
| PC3_Myc     | 0.091                  | 0.074                    | 0.986                      | 0                            | $3.1 \times 10^{-13}$    | 200      |
| SNU16_Myc   | 0.052                  | 0.662                    | 0.999                      | 0                            | $9.9 \times 10^{-4}$     | 194      |
| SNU16_fgfr2 | 0.066                  | 0.359                    | 1                          | 0                            | $1.9 \times 10^{-12}$    | 196      |
| GBM39_EGFR  | 0.071                  | 0.237                    | 0.977                      | 0                            | $6.6 \times 10^{-9}$     | 210      |
| COLO_Myc    | 0.075                  | 0.196                    | 0.994                      | 0                            | $2.4 \times 10^{-11}$    | 206      |
| GBM1        | 0.141                  | 0.073                    | 0.882                      | 0                            | 0.019                    | 85       |
| GBM2        | 0.082                  | 0.914                    | 0.757                      | 0                            | 0.028                    | 46       |
| GBM3        | 0.138                  | 0.131                    | 0.843                      | 0                            | 0.003                    | 72       |
| GBM4        | 0.254                  | 0.004                    | 0.759                      | 0                            | 0.014                    | 101      |
| GBM5        | 0.163                  | 0.01                     | 0.831                      | 0                            | 0.004                    | 103      |
| GBM6        | 0.159                  | 0.124                    | 0.833                      | 0                            | 0.057                    | 55       |
| Chp212      | 0.193                  | 0.048                    | 0.963                      | 0                            | $1.2 \times 10^{-10}$    | 154      |
| TR14_MYCN   | 0.047                  | 0.681                    | 0.987                      | 0                            | $1.6 \times 10^{-8}$     | 232      |
| TR14_CDK4   | 0.091                  | 0.174                    | 0.855                      | 0                            | $1.7 \times 10^{-13}$    | 284      |
| NB4         | 0.098                  | 0.177                    | 1                          | 0                            | $1.2 \times 10^{-8}$     | 126      |
| NB7         | 0.129                  | 0.313                    | 0.999                      | 0                            | $4.8 \times 10^{-3}$     | 56       |
| NB8         | 0.074                  | 0.375                    | 0.983                      | 0                            | $1.3 \times 10^{-6}$     | 151      |
| NB10        | 0.176                  | 0.004                    | 0.996                      | 0                            | $3.3 \times 10^{-6}$     | 98       |
| NB13        | 0.271                  | 0.001                    | 0.999                      | 0                            | 0.004                    | 155      |

110

111 **Table SI 2.** Test statistics to compare the theoretical ecDNA copy number distributions with experimental  
 112 measured ecDNA copy number distributions in patient and cell line data as presented in Figure 2 b and c in the  
 113 main text. The similarity of the two distributions is tested by a Kolmogorov-Smirnov test for two competing

114 hypothesis, random ecDNA segregation and non-random chromosomal segregation. We also test for normality  
 115 using the Shapiro-Wilk statistics.  
 116  
 117

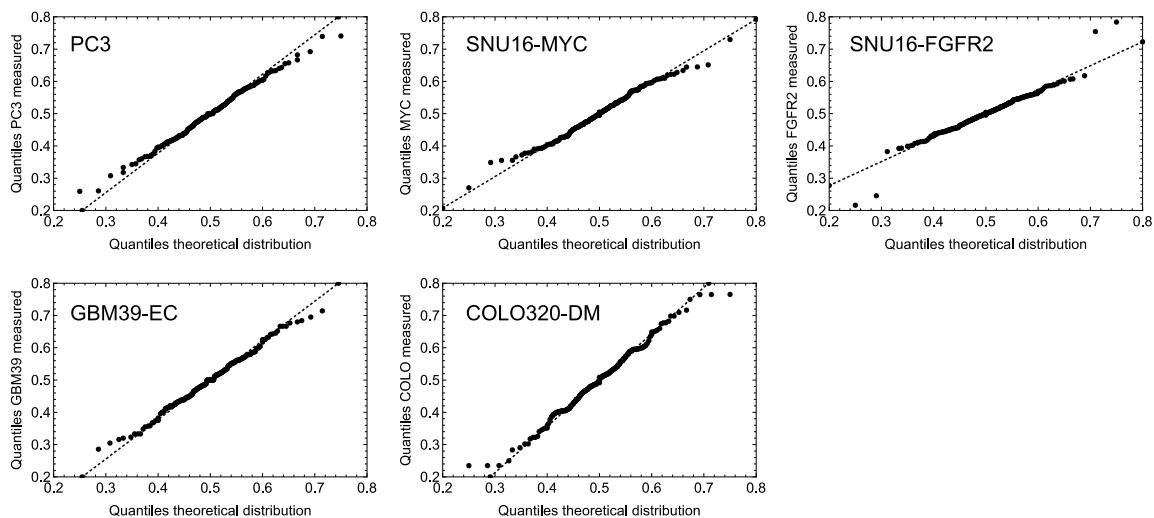

118  
 119 **Figure SI 2.** Quantile-Quantile\_plots to compare the theoretical and experimental distributions from single  
 120 cell ecDNA segregation probabilities presented in Figure 1c in the main text.  
 121  
 122  
 123

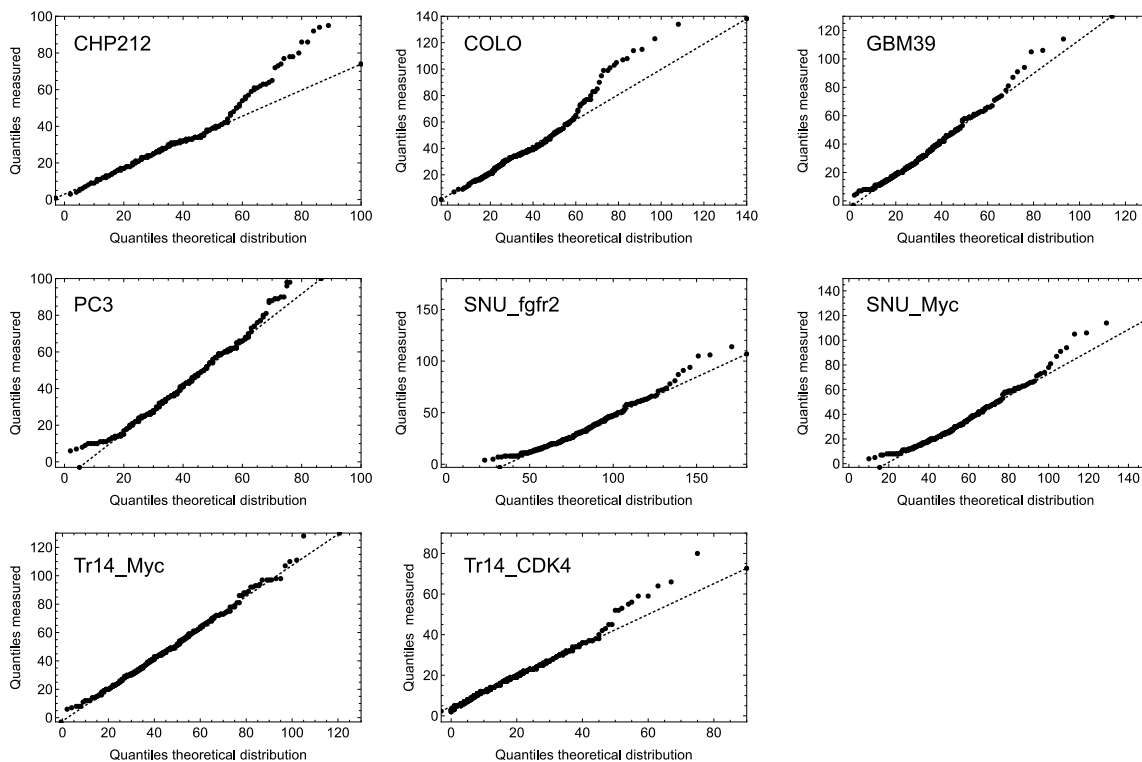

124  
 125 **Figure SI 3.** Quantile-Quantile\_plots to compare the theoretical and experimental ecDNA copy number  
 126 distribution in cell lines presented in Figure 2b in the main text.  
 127  
 128  
 129  
 130  
 131

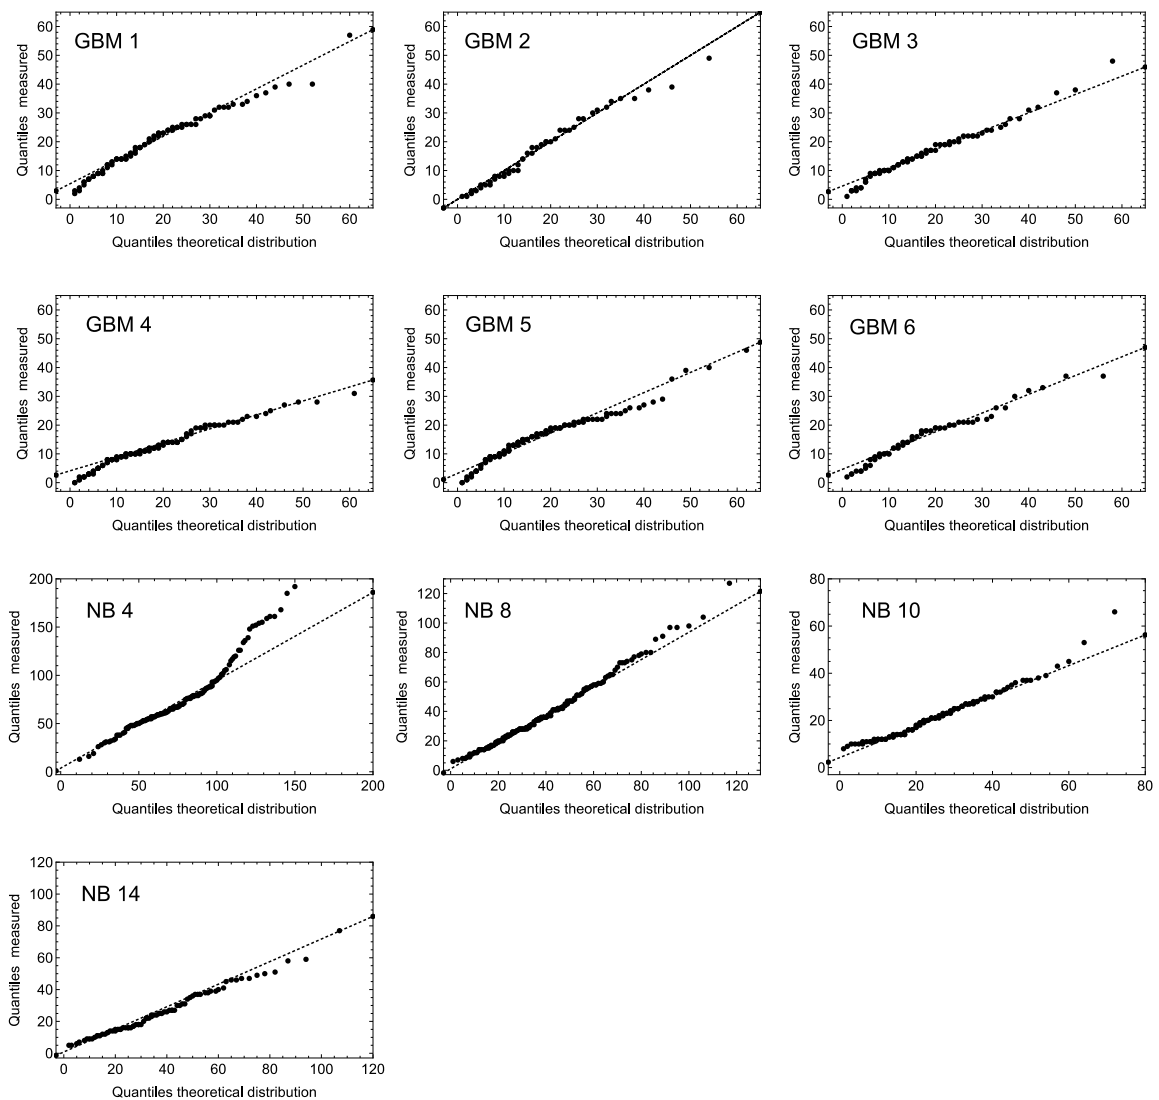133  
134

135 **Figure SI 4.** Quantile-Quantile\_plots to compare the theoretical and experimental ecDNA copy number  
 136 distribution in samples of Glioblastoma and Neuroblastoma patients presented in Figure 2c in the main text.

137

138

139

### 140 **1.3 Finite sampling and resolution limits**

141

142 In our stochastic simulations, we have the freedom to in principal sample and analyse as many  
 143 single cell ecDNA copy number profiles as we want. This is obviously not the case in our  
 144 experimental data due to technical and financial limitations. We thus tested if we can  
 145 reconstruct the ecDNA copy number distribution with limited single cell resolutions. We  
 146 generated a distribution of ecDNA copy numbers by simulating a tumour with  $10^7$  cells and  
 147 ecDNA under positive selection  $s = 2$ . We then sampled 10,000 times 25, 50, 100 and 500  
 148 cells respectively, constructed the ecDNA copy number distribution and calculated the  
 149 Kolmogorov distance

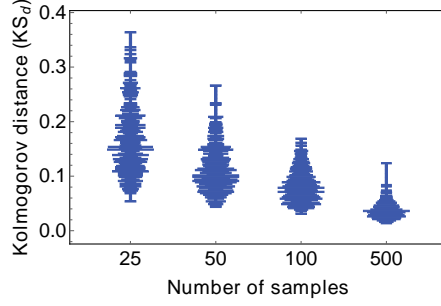

150  
151

152 **Figure SI 5.** Sampling of the ecDNA copy number distribution. We took  $10^4$  samples with 25, 50, 100 and 500  
153 cells respectively from a single simulation of the ecDNA distribution of  $10^7$  cells. Shown are the corresponding  
154 distributions of Kolmogorov distances. Resolution increases with sample size. Kolmogorov distances for samples  
155 of 100 cells are comparable to our experimental observations.

156  
157

158 of the sampled distribution to the true (non-sampled) distribution. As expected, the  
159 resolution increases with sample size. More importantly, we find Kolmogorov distances that  
160 are comparable to experimental data comparisons and a sample size in the order of 100 cells  
161 already allows us to capture important aspects of the ecDNA copy number distribution.

162  
163

## 164 2.1 Stochastic dynamics of ecDNA copy numbers under neutral selection

165  
166  
167

The dynamic equation for the number of cells  $N_k(t)$  with  $k$  neutral copies of ecDNA with time  $t$  becomes

$$168 \quad \frac{dN_k(t)}{dt} = -N_k(t) + 2 \sum_{i=\lceil k/2 \rceil}^{\infty} N_i(t) \binom{2i}{k} \frac{1}{2^{2i}}$$

169

170 This is a set of, in principal, infinitely many coupled differential equations, formally known as  
171 the Master equation of the underlying Markovian stochastic process. It describes the  
172 evolution of all states the system at question can be in. In our case, all possible states  
173 correspond to the number of cells with  $k$  copies of ecDNA. The left-hand side is the time  
174 derivative of the number of cells with  $k$  ecDNA copies. The right-hand side collects all possible  
175 events (rates) that change this number. If a cell with  $k$  copies divides, its copies are amplified  
176 and randomly distributed between both daughter cells. This reduces the number of cells with  
177 exactly  $k$  copies, reflected by the first term  $-N_k(t)$ . The second term on the right-hand side  
178 of the equation collects all cells of the system that gain  $k$  copies of ecDNA due to random  
179 segregation amongst daughter cells. Upon cell proliferation,  $2i$  copies are randomly  
180 segregated amongst two daughter cells. The number of ecDNA copies  $k$  in a daughter cell  
181 follows a Binomial distribution with success rate  $1/2$

182

$$183 \quad B\left(k \mid n = 2i, p = \frac{1}{2}\right) = \binom{2i}{k} \frac{1}{2^{2i}}$$

184

185 It turns out that working with cell densities  $\rho_k$  rather than total cell numbers  $N_k$  is  
186 advantageous. We therefore decouple population growth and demographic changes and  
187 write  $N_k(t) = N(t)\rho_k(t)$  with  $\sum_{i=1}^{\infty} \rho_i(t) = 1$  and  $N(t) = \sum_k N_k(t)$  denotes the total

188 number of cells at time  $t$ . We first can check that the structure of our equations is correct and  
 189 we recover an exponentially growing population for  $N(t)$  as we have claimed in our initial  
 190 assumptions. We can write:

191

$$\begin{aligned}
 \frac{dN(t)}{dt} &= -N(t) + 2N(t) \sum_{k=0}^{\infty} \sum_{i=\lceil k/2 \rceil}^{\infty} \rho_i(t) \binom{2i}{k} \frac{1}{2^{2i}} \\
 &= -N(t) + 2N(t) \sum_{i=0}^{\infty} \rho_i(t) \frac{1}{2^{2i}} \sum_{k=0}^{2i} \binom{2i}{k} \\
 &= -N(t) + 2N(t) \sum_{i=0}^{\infty} \rho_i(t) \frac{1}{2^{2i}} 2^{2i} = N(t)
 \end{aligned}$$

195

196 And we do find that the total population grows exponentially in time  $N(t) = N(0)e^t$ . This  
 197 allows us to write for the temporal change of cell densities  $\rho_k$  with  $k$  ecDNA copy numbers:

198

$$\frac{d\rho_k(t)}{dt} = -2\rho_k(t) + 2 \sum_{i=\lceil k/2 \rceil}^{\infty} \rho_i(t) \binom{2i}{k} \frac{1}{2^{2i}}$$

200

201

## 202 **2.2 Dynamics of Moments of ecDNA copies under neutral selection**

203

204 The Master equations above describe the full dynamics of the probability densities of the  
 205 ecDNA copy number distribution. They therefore encode in principle all properties of the  
 206 underlying stochastic process. However, a complete analytical treatment is challenging.  
 207 Nevertheless, many aspects of the system are analytically tractable. We first discuss the  
 208 dynamics of the moments of the ecDNA copy number distribution. In particular we are  
 209 interested in the first and second moment, as they are directly related to the mean ecDNA  
 210 copy number per cell and the expected variance of the ecDNA copy number distribution.

211

212 With above equation for the density of cells with  $k$  ecDNA copies, we can calculate the  
 213 moments of the underlying probability density function. In general, the  $l$ -th moment is  
 214 calculated via

215

$$M^{(l)}(t) = \sum_{i=0}^{\infty} i^l \rho_i(t)$$

216

217 The moment  $M^{(0)}(t)$  is just the sum over the density and by definition constant. The first  
 218 moment corresponds to the average number of ecDNA copies per cell and we can write:

219

$$\begin{aligned}
 \frac{dM^{(1)}(t)}{dt} &= -2M^{(1)}(t) + \sum_{k=0}^{\infty} \sum_{i=\lceil k/2 \rceil}^{\infty} k \rho_i(t) \binom{2i}{k} \frac{1}{2^{2i}} \\
 &= -2M^{(1)}(t) + \sum_{i=0}^{\infty} \rho_i(t) \frac{1}{2^{2i}} \sum_{k=0}^{2i} k \binom{2i}{k}
 \end{aligned}$$

221

222 
$$= -2M^{(1)}(t) + \sum_{i=0}^{\infty} \rho_i(t) \frac{1}{2^{2i}} (2i)2^{2i-1} = 0$$

223  
224

225 We therefore find  $M^{(1)}(t) = \text{const}$  and the constant is given by the initial conditions. In most  
226 cases discussed here, we will have  $M^{(1)}(t) = M^{(1)}(t = 0) = 1$ . In the case of neutral ecDNA  
227 dynamics starting from a single cell containing a single copy of ecDNA, on average the  
228 population maintains one copy of ecDNA per cell.

229

230 Next, we are interested in the second moment  $M^{(2)}(t)$ . Following our calculations for the first  
231 moment we can similarly write:

232

233 
$$\frac{dM^{(2)}(t)}{dt} = -2M^{(2)}(t) + \sum_{k=0}^{\infty} \sum_{i=\lceil k/2 \rceil}^{\infty} k^2 \rho_i(t) \binom{2i}{k} \frac{1}{2^{2i}}$$

234 
$$= -2M^{(2)}(t) + \sum_{i=0}^{\infty} \rho_i(t) \frac{1}{2^{2i}} \sum_{k=0}^{2i} k^2 \binom{2i}{k}$$

235 
$$= -2M^{(2)}(t) + \sum_{i=0}^{\infty} \rho_i(t) \frac{1}{2^{2i}} (2i + (2i)^2)2^{2i-2} = M^{(1)}(t)$$

236

237 With the initial conditions for the mean ecDNA copy numbers above we find the expression  
238  $M^{(2)}(t) = t + \text{const}$ . The constant can be fixed by the realisation that the variance of the  
239 ecDNA copy number distribution at time  $t = 0$  should equal 0 and we get  $\text{Var}(t = 0) =$   
240  $\text{const} - 1^2 = 0$ , and therefore  $\text{const} = 1$  and simply have that the variance increases linearly  
241 in time for neutral ecDNA copies,  $\text{Var}(t) = t$ .

242

243

244

245

246

247

248

249

250

251

252



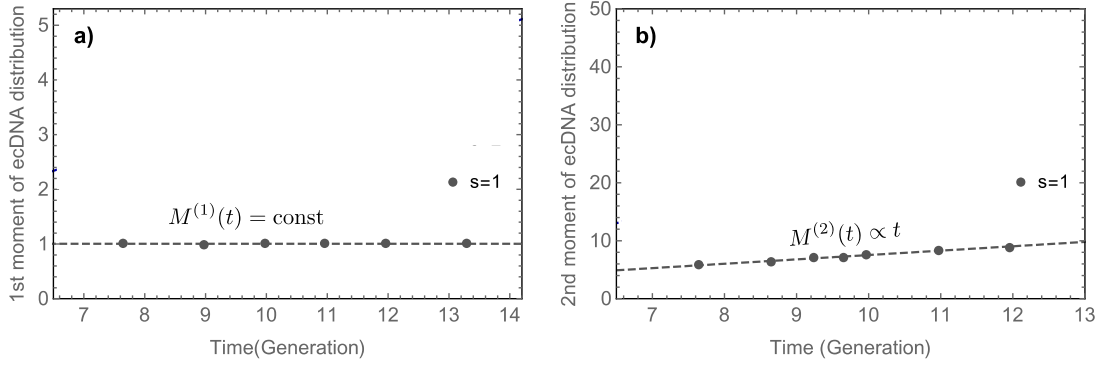

253  
254  
255  
256  
257

**Figure SI 6. a)** First and **b)** second moment of the ecDNA copy number distribution under neutral selection ( $s = 1$ ). The mean number of ecDNA copies remains constant and the variance increases linearly in time. Stochastic simulations (points) are in very good agreement to theoretical predictions of polynomial increasing moments with time (dashed lines).

258  
259

### 2.3 The scaling of the ecDNA copy number distribution in the continuous limit wave approximation

260  
261  
262  
263  
264  
265  
266  
267

In the following, we are interested in the scaling behaviour of the ecDNA copy number distribution, e.g. what is the probability for a single cell to carry many copies of ecDNA. We will find that the right-hand tail of the ecDNA distribution towards large copy number scales with a power law inversely proportional to the copy number  $k$ .

268  
269  
270  
271  
272  
273

Our general time dynamics describe discrete copy number states. To make further analytical progress, we now consider continuous states in the following calculations. This is an approximation that works well for the case of many ecDNA copies, but might be inaccurate for cells with very few copies of ecDNA. Under this continuous assumption, the change of the ecDNA copy number distribution becomes

274

$$\frac{d\rho_k(t)}{dt} = -2\rho(k, t) + \frac{2}{\sqrt{\pi}} \int_{k/2}^{\infty} dy \frac{\rho_y(t)}{\sqrt{y}} e^{\frac{(k-y)^2}{y}}$$

275  
276  
277  
278

Where we replaced the Binomial with a Normal distribution. Given the exponential character of the ecDNA distribution, we proceed with an Ansatz in the form of a scaling wave solution

279  
280

$$\rho_k(t) = e^{-vt} \Omega(ke^{-vt}).$$

281  
282

Plugging our ansatz into the differential equation for the density  $\rho$  and setting  $\frac{k}{2} \rightarrow 0$ , we get

283

$$\frac{d}{dt} [e^{-vt} \Omega(ke^{-vt})] = -2e^{-vt} \Omega(ke^{-vt}) + \frac{2}{\sqrt{\pi}} \int_{k/2}^{\infty} dy \frac{e^{-vt} \Omega(ke^{-vt})}{\sqrt{y}} e^{\frac{(k-y)^2}{y}}$$

284  
285  
286

With  $z = ke^{-vt}$  and  $v = 2$ , this transforms into

287

$$-z \frac{d}{dz} \Omega(z) = \frac{1}{\sqrt{\pi}} \int_{-\infty}^{\infty} dm \Omega(z) \frac{1}{\sqrt{z}} e^{\frac{-m^2}{z}} = \Omega(z).$$

288  
289  
290  
291

This has the solution  $\Omega(z) = c/z$  with an undetermined integration constant  $c$ . Plugging this back into our original ansatz and reversing all substitutions, this gives us for the scaling of the ecDNA copy number distribution

292  
293

$$\rho_k(t) = \frac{c}{k}.$$

294  
295  
296  
297  
298  
299

This predicts a power law scaling of the right-hand side tail of the ecDNA copy number distribution. Cells with very large copy number status become increasingly less likely for increasing  $k$ , for a sufficiently large tumour population, a considerable fraction of cells is expected to have large ecDNA copy number. This is indeed supported by observations both in cell line and patient data, where we recover these power law dependencies.

300  
301

### **3.1 Stochastic dynamics of ecDNA copies under constant positive selection**

302  
303  
304  
305  
306  
307

In the previous sections, we discussed the stochastic dynamics of extra-chromosomal DNA under neutral selection. In that scenario, ecDNA is present in cells, but does not change the proliferative fitness of the cell. Next, we consider the case of ecDNA that is under positive selection, or in other words, ecDNA that gives a positive fitness advantage to cells. This will be of particular interest to the dynamics and diversification of ecDNA in cancerous tissues.

308  
309  
310  
311  
312

In order to model a selection advantage, we introduce a selection coefficient  $s > 0$ . In this notation,  $s = 1$  corresponds to neutral dynamics,  $s > 1$  to a selection advantage of cells with ecDNA and  $0 \leq s < 1$  to a selection disadvantage of cells without ecDNA. The Master equation then needs to be modified in the following way

313  
314  
315

$$\begin{aligned} \frac{dN_k(t)}{dt} &= -sN_k(t) + 2s \sum_{i=\lceil k/2 \rceil}^{\infty} N_i(t) \binom{2i}{k} \frac{1}{2^{2i}} \\ \frac{dN_0(t)}{dt} &= N_0(t) + 2s \sum_{i=1}^{\infty} N_i(t) \frac{1}{2^{2i}} \end{aligned}$$

318  
319

It can easily be checked that for  $s \rightarrow 1$ , we recover the Master equation in the neutral selection case. Above general Master equation for the selection case can also be written in a more compact form. Changing to the densities again, this compact form is given by

320  
321  
322  
323  
324  
325  
326

$$\begin{aligned} \left. \frac{d\rho_k(t)}{dt} \right|_{k>0} &= s \left. \frac{d\rho_k(t)}{dt} \right|_{s=1} + (s-1)\rho_k\rho_0 \\ \left. \frac{d\rho_0(t)}{dt} \right|_{s=1} &= s \left. \frac{d\rho_k(t)}{dt} \right|_{s=1} + (s-1)(1-\rho_0)\rho_0 \end{aligned}$$

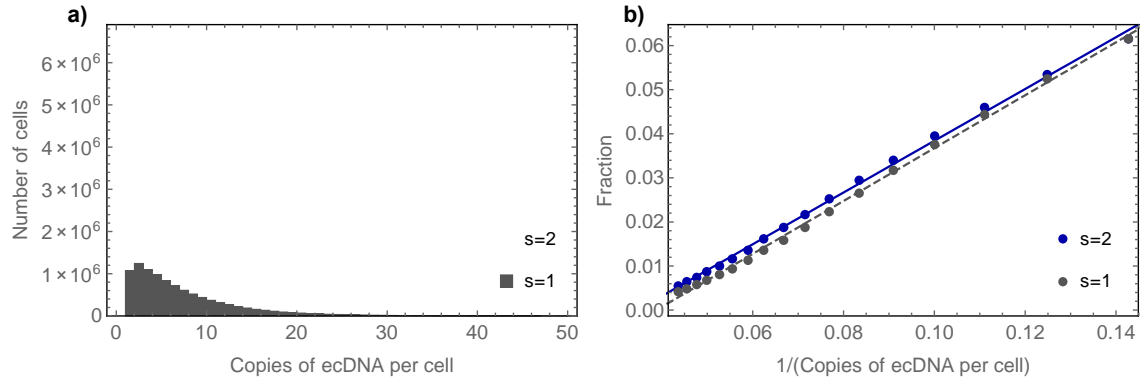

327  
 328 **Figure SI 7.** Distribution and scaling of the ecDNA copy number distribution. **a)** Distribution of the ecDNA copy  
 329 number distribution for neutral (grey) and positively selected (blue) ecDNA evolution for 1000 repeats of  
 330 stochastic simulations for tumours of  $10^4$  cells. Overall, more cells carry copies of ecDNA if positively selected  
 331 compared to the neutral case. **b)** The scaling of the right-hand tail of the ecDNA distribution follows the predicted  
 332  $1/k$  scaling (dots = stochastic simulations, lines = theoretical expectation).

333  
 334

335 Allowing for selection adds an additional non-linear term to the original Master equation. We  
 336 can also check the growth of the tumour population with ecDNA under positive selection. The  
 337 equation for the total population now becomes

338

$$\frac{dN(t)}{dt} = sN(t) - (s - 1)\rho_0(t)N(t).$$

339

340 The second term on the right-hand side of the equation contains the density of cells without  
 341 ecDNA  $\rho_0(t)$ . We do not have a general solution for this expression, but we will see later  
 342 that  $\rho_0(t \rightarrow \infty) \rightarrow 0$ . Consequently, for sufficiently large  $N$  the tumour population will grow  
 343 exponentially with  $N_{s>1} = e^{st}$ . Or, if we compare the relative change of fitness at any given  
 344 time  $t$  we get

345

$$\text{Log}[N_{s>1}(t)] - \text{Log}[N_{s=1}(t)] = (s - 1)t.$$

346

347 In the initial phase of tumour growth, the term  $-(s - 1)\rho_0(t)N(t)$  in above equation cannot  
 348 be neglected and the growth will be in the interval

349

$$t \leq \text{Log}[N_{s>1}(t)] \leq st$$

350

351 slowly approaching the slope of  $st$  with increasing time.

352

### 353 **3.2 Dynamics of Moments of ecDNA copies under positive selection**

354

355 In the following we discuss the dynamics of Moments for ecDNA under positive selection.  
 356 Following the steps above and using the generalised Master equation for the selection case,  
 357 we find the following dynamic equation for the Moments

358

$$\frac{dM^{(l)}(t)}{dt} = s \frac{dM^{(l)}(t)}{dt} \Big|_{s=1} + (s - 1)\rho_0 M^{(l)}(t).$$

359

360

361

362

363

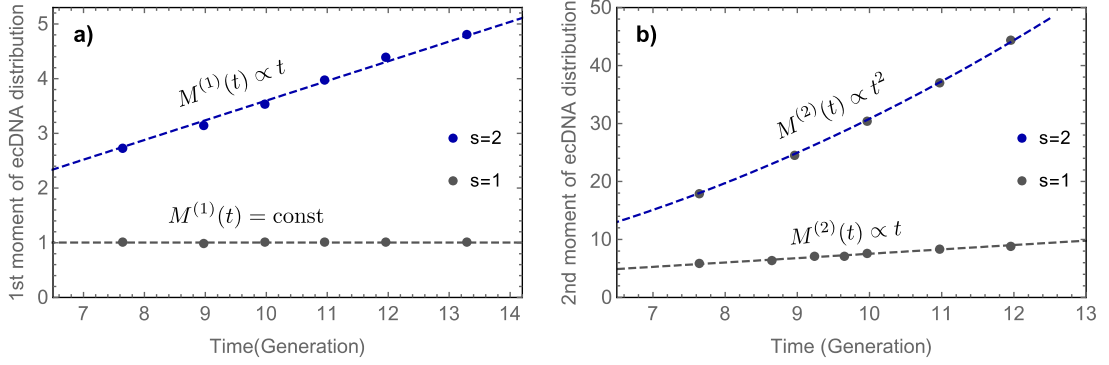

364  
365

366 **Figure SI 8. a)** First and **b)** second moment of the ecDNA copy number distribution. In the neutral case ( $s = 1$ ,  
367 grey) the mean number of ecDNA copies remains constant and the variance increases linearly in time. Under  
368 positive selection ( $s = 2$ , blue) the mean number of ecDNA copies increases in time. Stochastic simulations  
369 (points) are in very good agreement to theoretical predictions of polynomial increasing moments with time  
370 (dashed lines).

371  
372

373 This implies for the first moment  $\frac{dM^{(1)}(t)}{dt} = (s - 1)\rho_0 M^{(1)}(t)$ , which then can be solved for  
374 the first moment

375

$$376 M^{(1)}(t) = e^{(s-1)\int_0^t d\tau \rho_0(\tau)}.$$

377

378 Importantly, for positive selection we have  $s > 1$  and therefore  $s - 1 > 0$ . Furthermore, the  
379 integral is strictly positive, such that the first moment is expected to increase over time. In  
380 other words, in a growing tumour population with ecDNA under positive selection, we expect  
381 the average ecDNA copy number per cell to increase in time. This is in contrast to the neutral  
382 case, where the average ecDNA copy number is expected to remain constant over time.

383

384 Similarly, the dynamic equation for the second moment becomes

$$385 \frac{dM^{(2)}(t)}{dt} = M^{(1)}(t) + (s - 1)\rho_0 M^{(2)}(t) \text{ and we find}$$

386

$$387 M^{(2)}(t) = tM^{(1)}(t).$$

388

389

390 The second moment is increasing as well, but now with an additional factor  $t$  compared to  
391 the neutral case. Similar to the argument above, it follows that higher moments follow the  
392 form

393

$$394 M^{(l)}(t) = P_l(t) e^{(s-1)\int_0^t d\tau \rho_0(\tau)} \sim t^{l-1} M^{(1)}(t).$$

395

396

397

#### 398 **4.1 Deterministic population dynamics**

399

400 We have in the chapters above discussed stochastic aspects of the ecDNA copy number  
 401 distribution for positive and neutral selection. Another question of interest is how the fraction  
 402 of cells with and without ecDNA change in a growing tumour population. We therefore  
 403 change the formulation of our mathematical model to a more coarse-grained picture and only  
 404 consider cells with ecDNA  $N^+(t)$  and cells without ecDNA  $N^-(t)$ . For cells with ecDNA, we  
 405 do not distinguish between different copy number states. With the notation of the former  
 406 chapters, we identify  $N^-(t) = N_0(t)$  and  $N^+(t) = \sum_{k=1}^{\infty} N_k(t)$ .

407  
 408 We can write for the change of these cells in time  $t$

409  
 410 
$$\frac{dN^-(t)}{dt} = N^-(t) - v(N^+(t))N^+(t)$$
  
 411 
$$\frac{dN^+(t)}{dt} = v(N^+(t))N^+(t)$$

412  
 413 where  $v(N^+(t))$  is the rate at which cells with ecDNA lose all ecDNA copies by chance due to  
 414 complete asymmetric random ecDNA segregation (one daughter cell inherits all copies of  
 415 ecDNA, while the other cell does not inherit any). Looking at the fraction of cells with ecDNA  
 416  $f^-(t) = \frac{N^-(t)}{N^+(t) + N^-(t)}$ , we can write

417  
 418 
$$\frac{d}{dt} \left( \frac{N^-(t)}{N^+(t) + N^-(t)} \right) = \frac{d}{dt} f^-(t) = (1 - f^-(t)) v(N^+(t))$$

419  
 420 Rearranging terms gives

421  
 422 
$$v(N^+(t)) = 1 - \frac{1}{N^+(t)} \frac{dN^+(t)}{dt}$$

423  
 424 and thus we can find for the fraction of cells without ecDNA the following relation

425  
 426 
$$\frac{1}{1 - f^-(t)} \frac{df^-(t)}{dt} + \frac{1}{N^+(t)} \frac{dN^+(t)}{dt} = 0.$$

427  
 428  
 429 This equation can be integrated by separation of variables. With the initial condition  $N^+(0) =$   
 430  $1$  and  $f^-(0) = 0$  the number of cells with ecDNA is given by

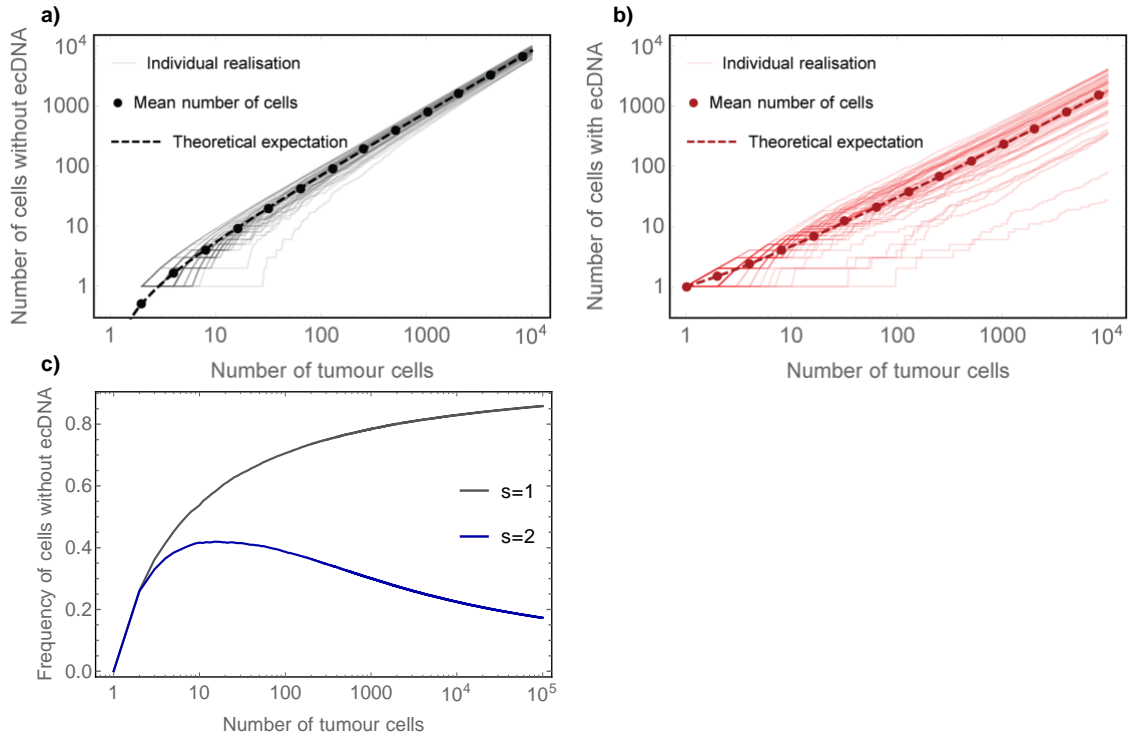

431  
432

433 **Figure SI 9.** Comparison of average deterministic dynamics of cells a) without and b) with copies of ecDNA for  
 434 neutral ecDNA dynamics ( $s = 1$ ). Dots show the average dynamics of neutral stochastic simulations, lines are  
 435 individual realisation of the same neutral stochastic process and dashed lines show analytical predictions.  
 436 Between tumour variation is considerable, especially for small tumour populations. c) Fraction of cells without  
 437 ecDNA over time. In the neutral case  $s = 1$  the tumour will be dominated by cells without ecDNA, also the fitness  
 438 of cells with and without ecDNA is the same. Under strong positive selection, where cells with ecDNA have a  
 439 selection advantage  $s = 2$ , the frequency of cells without ecDNA approaches 0. Even for strong positive selection  
 440 we observe a transient increase of cells without ecDNA.

441  
442

$$N^+(t) = (1 - f^-(t))e^t.$$

444

445 Stochastic simulations show that for neutral dynamics,  $\frac{N^-(t)}{N^+(t)} = \frac{1}{2}t$  and therefore the fraction  
 446 of cells without ecDNA changes according to

447

$$f^-(t) = \frac{N^-(t)}{N^+(t) + N^-(t)} = \frac{1}{\frac{N^+(t)}{N^-(t)} + 1} = \frac{1}{\frac{2}{t} + 1} = \frac{t}{2 + t}.$$

449  
450

451 We see that  $f^-(0) = 0$  and  $f^-(t \rightarrow \infty) \rightarrow 1$ , in the long run a growing population with  
 452 neutral ecDNA elements will be dominated by cells without ecDNA. This can also be seen from  
 453 the fraction of cells carrying ecDNA. From the simple condition  $f^-(t) + f^+(t) = 1$  we find

454

$$f^+(t) = 1 - \frac{t}{2 + t} = \frac{2}{2 + t} = \frac{2}{2 + \text{Log}[N]}.$$

455  
456

457 Also, the number of cells with ecDNA continuously decreases in the neutral case, the decrease  
 458 is proportional to  $\sim \text{Log}^{-1}[N]$  and thus relatively slow. For example, in a population of  $10^3$   
 459 cells, the expected fraction would be 22%, in a population of  $10^6$  cells the fraction becomes  
 460 13% and in a population of  $10^{11}$  cells it is 7%. With single cell resolution, we might expect to  
 461 detect low levels of neutral ecDNA copies in tumour populations.

462

463 The population dynamics changes when ecDNA is under positive selection. As previously, we  
 464 introduce a selection coefficient  $s > 0$ , with  $s = 1$  corresponding to neutral selection and  
 465  $s > 1$  to a selective advantage of cells carrying ecDNA. The population level dynamics now  
 466 changes to

467

$$\begin{aligned} \frac{dN^-(t)}{dt} &= N^-(t) + sv(N^+(t))N^+(t) \\ \frac{dN^+(t)}{dt} &= sN^+(t) - sv(N^+(t))N^+(t) \end{aligned}$$

470

471 Following the same steps as above, this can be transformed in a single set of equations

472

$$(s - 1)f^-(t) + \frac{1}{1 - f^-(t)} \frac{df^-(t)}{dt} + \frac{1}{N^+(t)} \frac{dN^+(t)}{dt} = s$$

474

475 Again, this equation can be formally integrated by the separation of variables and we get

476

$$N^+(t) = (1 - f^-(t))e^{st - (1-s) \int_0^t f^-(\tau) d\tau}$$

478

479 A closed solution is more challenging in the selection case as we do not have a closed  
 480 expression for  $\int_0^t f^-(\tau) d\tau$ . However, we find numerically  $f^-(t \rightarrow \infty) \rightarrow 0$  and thus for  
 481 sufficiently long time, the number of cells with ecDNA grows with  $N^+(t) \approx e^{st}$ . A tumour  
 482 population with ecDNA copies under positive selection, will be dominated by cells carrying  
 483 ecDNA.

484

#### 485 **4.2 Dynamic predictions of ecDNA under neutral vs positive selection**

486

487 In the previous chapter, we have discussed the stochastic dynamics of the ecDNA copy  
 488 number distribution as well as the deterministic aspect of the population dynamics of cells  
 489 with and without ecDNA in exponentially growing populations. This leads to three major  
 490 predictions that differ between cell populations under neutral dynamics or positive selection.

491

492 (i) Fraction of cells with and without ecDNA: Theory predicts that the fraction of cells  
 493 with ecDNA approaches 0 under neutral dynamics and approaches 1 if ecDNA is  
 494 under positive selection. The rate of convergence depends on the strength of  
 495 selection. In all patient and cell line samples, we find a very high fraction of cells  
 496 with ecDNA, suggesting positive selection.

497

498 (ii) Average ecDNA copy number per cell: Theory predicts that the average ecDNA  
 499 copy number per cell increases in time, if ecDNA is under positive selection and  
 500 remains on average at 1 if ecDNA is under neutral selection. In all patient and cell

501 line samples we find average ecDNA copy numbers  $\gg 1$ , suggesting positive  
502 selection.

503

504 (iii) Power law scaling of the ecDNA copy number distribution: Theory predicts a  
505 1/copy number scaling of the ecDNA copy number distribution for both neutral  
506 and positive selection. We find this scaling in patient and cell line experiments.  
507 However, the ecDNA copy number distribution shifts towards higher copy number  
508 under positive selection and consequently, the power law tail is shifted towards  
509 higher ecDNA copy number as well. We observe these behaviours in patient and  
510 cell line experiments.

511

512

513
